# Supplementary material
Source: publisher figshare collection journal article supplement (https://acs.figshare.com/ndownloader/files/4647967)

## Supplementary data

**Table 1 Structural statistics.**  $E_{\text{pot}}$ , overall potential energy;  $E_{\text{impr}}$ , potential energy of improper angle;  $E_{\text{cdih}}$ , potential energy for dihedral restraints;  $E_{\text{sani}}$ , potential energy for RDC restraints.

| experimental restraints              |                    |                 |
|--------------------------------------|--------------------|-----------------|
| distance restraints                  | total              | 1929            |
|                                      | intraresidual      | 468             |
|                                      | sequential         | 423             |
|                                      | medium-range       | 289             |
|                                      | long-range         | 638             |
| dihedral angles                      |                    | 32              |
| dipolar couplings                    |                    | 55              |
| hydrogen bonds (two restraints each) |                    | 24              |
| molecular dynamics statistics        |                    |                 |
| energies (kcal/mol)                  |                    |                 |
|                                      | $E_{\text{pot}}$   | $12.9 \pm 1.4$  |
|                                      | $E_{\text{bond}}$  | $0.73 \pm 0.06$ |
|                                      | $E_{\text{angle}}$ | $7.9 \pm 0.6$   |

| experimental restraints                |                              |                       |
|----------------------------------------|------------------------------|-----------------------|
|                                        | $E_{\text{impr}}$            | $2.1 \pm 0.2$         |
|                                        | $E_{\text{repel}}$           | $0.79 \pm 0.3$        |
|                                        | $E_{\text{NOE}}$             | $1.3 \pm 0.5$         |
|                                        | $E_{\text{cdih}}$            | $0.03 \pm 0.03$       |
|                                        | $E_{\text{sani}}$            | $0.7 \pm 0.2$         |
| RMSDs from ideal<br>distances (Å)      | bond lengths                 | $0.00074 \pm 0.00004$ |
|                                        | distance restraints          | $0.0035 \pm 0.0007$   |
| RMSDs from ideal<br>angles (deg)       | bond angles                  | $0.14 \pm 0.06$       |
|                                        | dihedral angle<br>restraints | $0.15 \pm 0.15$       |
| RMSDs from dipolar<br>couplings (Hz)   |                              | $0.11 \pm 0.02$       |
| atomic coordinate precision (RMSD) (Å) |                              |                       |
| backbone heavy<br>atoms                |                              | 0.69 (Gly39-Thr118)   |
| heavy atoms                            |                              | 1.19 (Gly39-Thr118)   |
| Ramachandran plot statistics           |                              |                       |
| residues in                            |                              |                       |
|                                        | most favored<br>regions      | 88.0%                 |

| experimental restraints |                 |       |
|-------------------------|-----------------|-------|
|                         | allowed regions | 12.0% |

**Fig. Dissociation constants for NELF-E RRM:TAR complexes.** Fitting of the curves yielded the calculated  $K_d$  values shown in the inset. Normalized chemical shift changes of G39 were used.

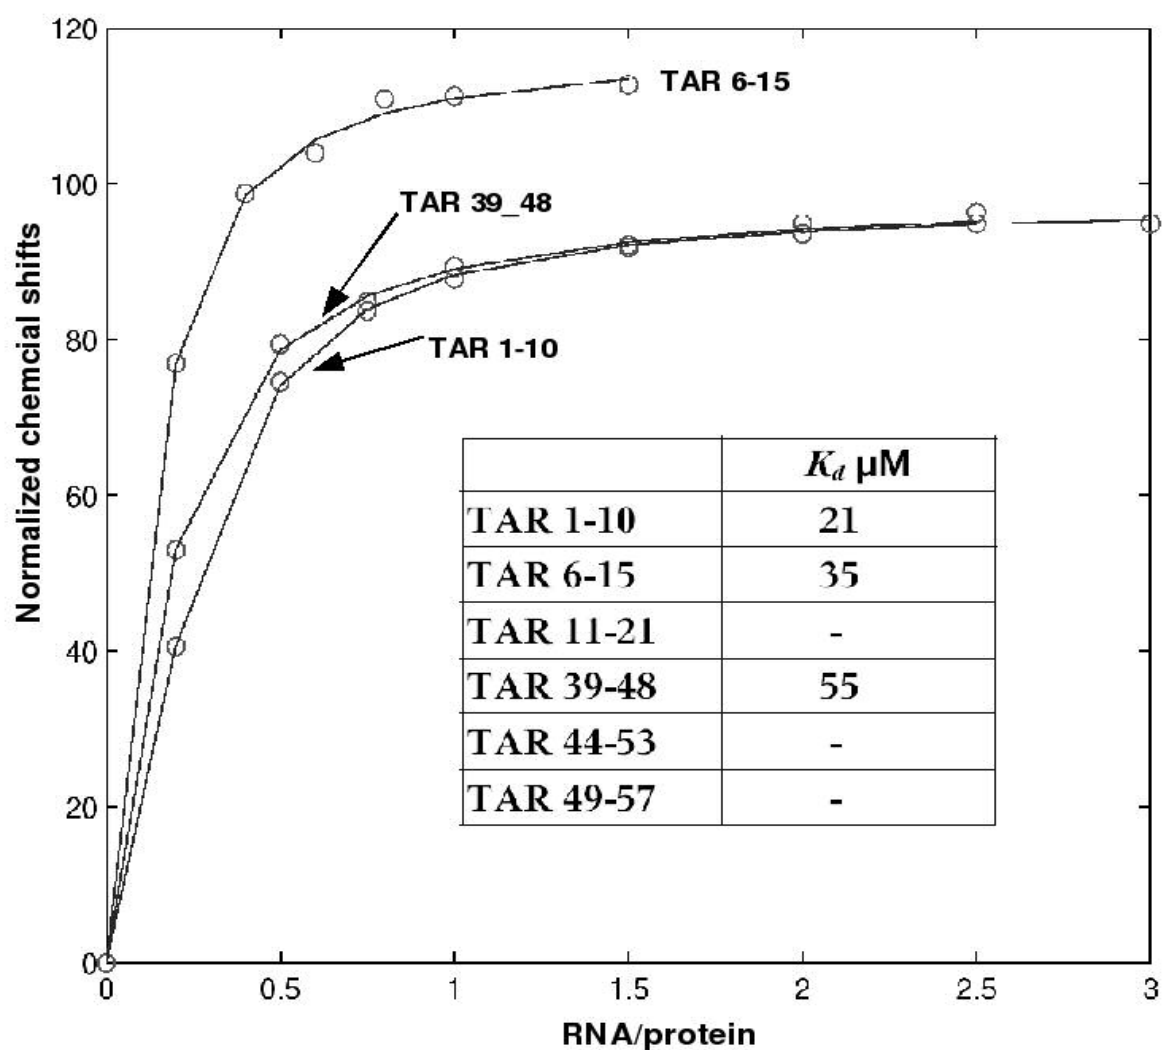

Supplement: Supplementary file 1 [file 4647967]
